# Supplementary material for: Hydrophobic Properties Imparted to Metal Powders as a Protection against Corrosion
Source: Royal Society of Chemistry journal article supplement (doi:10.1039/c5cp03046c), 1950-06-21
Supplement: c5cp03046c1.pdf [file c5cp03046c1.pdf]

## Re-examining the Chevrel phase $\text{Mo}_6\text{S}_8$ cathode for Mg intercalation from an electronic structure perspective

Florian Thöle,<sup>a</sup> Liwen F. Wan<sup>b</sup> and David Prendergast<sup>\*bt</sup>

<sup>a</sup> Materials Theory, Department of Materials, ETH Zürich, Zürich, Switzerland 8093

<sup>b</sup> Joint Center for Energy Storage Research (JCESR), The Molecular Foundry, Lawrence Berkeley National Laboratory, Berkeley, California, United State 94720

<sup>†</sup> E-mail: dgprendergast@lbl.gov

**Table S1:** A comparison of the calculated lattice parameters for  $\text{Mo}_6\text{S}_8$ ,  $\text{MgMo}_6\text{S}_8$ , and  $\text{Mg}_2\text{Mo}_6\text{S}_8$  at  $U = 0$  and  $U = 3.16$  eV.

| Structure                          | Methods | a (Å) | b (Å) | c (Å) | $\alpha$ (°) | $\beta$ (°) | $\gamma$ (°) |
|------------------------------------|---------|-------|-------|-------|--------------|-------------|--------------|
| $\text{Mo}_6\text{S}_8$            | GGA+U   | 6.446 | -     | -     | 91.50        | -           | -            |
|                                    | GGA     | 6.509 | -     | -     | 91.59        | -           | -            |
| $\text{MgMo}_6\text{S}_8$          | GGA+U   | 6.508 | 6.514 | 6.509 | 92.79        | 92.79       | 93.67        |
|                                    | GGA     | 6.564 | 6.573 | 6.565 | 93.13        | 93.12       | 93.93        |
| $\text{Mg}_2\text{Mo}_6\text{S}_8$ | GGA+U   | 6.562 | -     | -     | 92.82        | -           | -            |
|                                    | GGA     | 6.601 | -     | -     | 92.78        | -           | -            |

Using standard PBE-GGA functional, the calculated lattice constants are slightly larger than the results obtained with a U correction.

**Figure S1:** Total electronic density of states for  $\text{Mo}_6\text{S}_8$ ,  $\text{MgMo}_6\text{S}_8$  and  $\text{Mg}_2\text{Mo}_6\text{S}_8$ , simulated using the PBE-GGA functional.

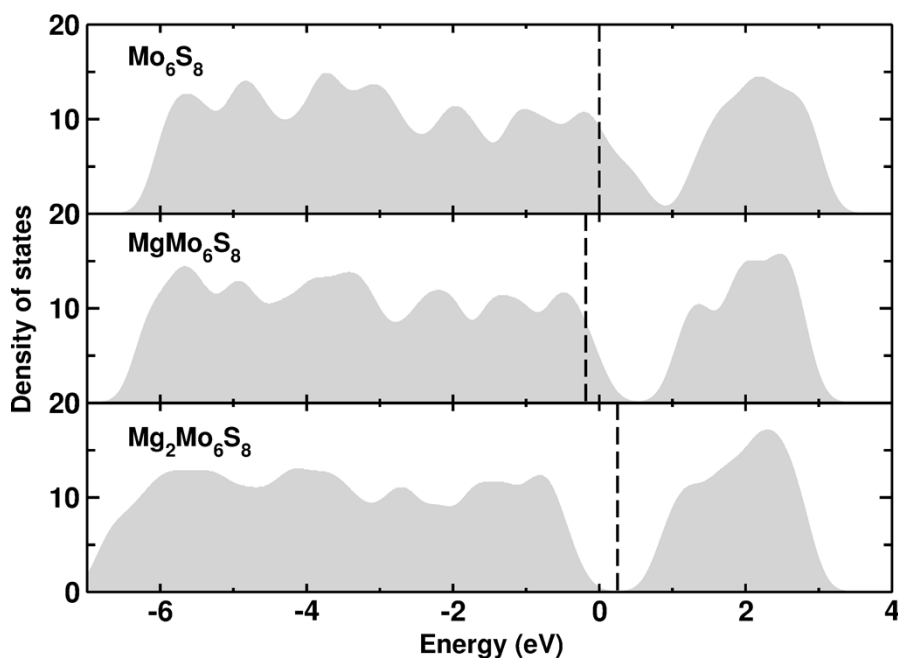

The total densities of states obtained using standard PBE-GGA functional are qualitatively the same as the results at  $U = 3.16$  eV. However, the band gap in  $\text{Mg}_2\text{Mo}_6\text{S}_8$  is substantially underestimated because the Mo d-electrons are treated too delocalized in the PBE functional.
